# Supplementary material
Source: PubMed Central journal article supplement (PMC3197451)
Supplement: supp_mcr223_mcr223supp_tables.pdf [file supp_mcr223_mcr223supp_tables.pdf]

## SUPPLEMENTARY DATA

TABLE S1. Gene-specific primers for confirmation of *zmP4H* in HZ32

| Gene <sup>a</sup> | Location <sup>b</sup> | Primer <sup>c</sup>                                |
|-------------------|-----------------------|----------------------------------------------------|
| <i>zmP4H1</i>     | 78–1074               | CCACGCGTGAGCTGCAA<br>TTGAACCGGTGCATGACCTC          |
| <i>zmP4H2</i>     | 101–1061              | TCTCGCCGCGACATGAATT<br>GACTACTACGCAACACGCCA        |
| <i>zmP4H3</i>     | 154–1052              | CCTCTCCCGTGAGGCCGTGA<br>TCGCCTTTGATGACGGGGCA       |
| <i>zmP4H4</i>     | 172–931               | ACTGGTGCCACACGGCTA<br>AAGAAGAGCACGGCGTCGCC         |
| <i>zmP4H5</i>     | 134–1118              | CCCTCCCCACACCACCCACCTG<br>AGGCTCAAGCTTTGTACTCGTGGA |
| <i>zmP4H6</i>     | 93–742                | CTTCTCGCCGCCATCGTGCT<br>GGGCAGCTCCCGTGGAGACT       |
| <i>zmP4H7</i>     | 176–843               | TCCTTCGACCCATCCCGCGT<br>CCCGGCTGCTTGACGGTGAG       |
| <i>zmP4H8</i>     | 96–930                | GTGTCCGCGCCAAATGCTGC<br>CCTTCACATGGCCAAGGTCC       |
| <i>zmP4H9</i>     | 315–1049              | GGTGGAGGCAGCAAGGGCAG<br>CGCGCAGCTCTCGTTCTCGT       |

<sup>a</sup> The name of *zmP4H* genes.

<sup>b</sup> The locations of the primers. The forward primer was located in the first exon and the reverse one was located in the last exon.

<sup>c</sup> The sequence of the primers.

TABLE S2. Gene-specific primers for RT-PCR in HZ32

| Gene <sup>a</sup> | Name <sup>b</sup> | Primer <sup>c</sup>        |
|-------------------|-------------------|----------------------------|
| <i>zmP4H1</i>     | P1-RT-F           | GACAGCAGGGTGCGGACAAGT      |
|                   | P1-RT-R           | CCACCATGCAGGCTTGTGGGAT     |
| <i>zmP4H3</i>     | P3-RT-F           | GGCCGGAGATGCCTTACGGC       |
|                   | P3-RT-R           | ACCGCAGGACATTAATGGCTCCC    |
| <i>zmP4H4</i>     | P4-RT-F           | CAACGCCAAGGGTTGGGAGT       |
|                   | P4-RT-R           | GCGCAGCGCTCGCTCCTATC       |
| <i>zmP4H7</i>     | P7-RT-F           | TTTCTGCAGCCACCTCCGTCT      |
|                   | P7-RT-R           | GCCGCCAGGGCCTGATTATT       |
| <i>zmP4H9</i>     | P9-RT-F           | CTCAAGAGGTCAGCGGTCCGC      |
|                   | P9-RT-R           | GGGCGTCACCTTTCCGTGGT       |
| <i>zmP4H2</i>     | P2-F              | TCTCGCCGCGACATGAATTT       |
|                   | P2-R              | GACTACTACGCAACACGCCA       |
|                   | P2-NM-RT-F        | TGGTTCCTTCGACCCATCCC       |
|                   | P2-NM-RT-R        | ACCGGTTTAACTGCATATCCA      |
|                   | P2-AS-RT-F        | TCGCGCTGGCCAAGGACAAG       |
| <i>zmP4H6</i>     | P2-AS-RT-R        | AAGAGCCATGGGCCCTGCAT       |
|                   | P6-all-RT-F       | CGGCGAGCGTCACTCAGCTC       |
| <i>zmP4H8</i>     | P6-all-RT-R       | CGCCGACCATTTCTCGCCCT       |
|                   | P8-RT-F           | ATTGGCCAAGCCTCACATGG       |
| <i>actin</i>      | P8-RT-R           | TCCTCTATAGTTGGGGTACTGCAAGG |
|                   | <i>actin-1</i>    | TCACCCACACTGTGCCCATCTACGA  |
| <i>γ-ubulin</i>   | <i>actin-2</i>    | CAGCGGAACCGCTCATTGCCAATGG  |
|                   | <i>tubulin-1</i>  | TCTCCAGGGTCCTCCATTCC       |
| <i>adh-1</i>      | <i>tubulin-2</i>  | TGTCGTCCAACCTTACAACACTACT  |
|                   | M-ADH1-RT-1       | GAGCCGTTGGTCTTGCCGCT       |
|                   | M-ADH1-RT-2       | GAACGGGACGCTGTGCGTGA       |

<sup>a</sup> The names of *zmP4H* genes.

<sup>b</sup> The names of the primers.

<sup>c</sup> The sequence of the primers.

TABLE S3. Gene-specific primers for real time PCR in HZ32

| Gene <sup>a</sup> | Name <sup>b</sup> | Primer <sup>c</sup>   |
|-------------------|-------------------|-----------------------|
| <i>zmP4H1</i>     | QT-zmP4H1-1       | GCCTGCATGGTGGATGCCCA  |
|                   | QT-zmP4H1-2       | ACCGGTGCATGACCTCAGGT  |
| <i>zmP4H3</i>     | QT-zmP4H3-1       | GCGTGGCCGGAGATGCCTTAC |
|                   | QT-zmP4H3-2       | ACAAAGCACGAGGCTGCCAGC |
| <i>zmP4H4</i>     | QT-zmP4H4-1       | GCGGACAACGAGTCCGGCAA  |
|                   | QT-zmP4H4-2       | TCCGACTCACCACCGGGTCC  |
| <i>zmP4H7</i>     | QT-zmP4H7-1       | TCCTTCGACCCATCCCGCGT  |
|                   | QT-zmP4H7-2       | GGTGGTCGCACTCCGCATCC  |
| <i>zmP4H9</i>     | QT-zmP4H9-1       | TACCCGCATCACTCCCGCCA  |
|                   | QT-zmP4H9-2       | AGCCTCGTCGTCGCTGAGGA  |
| <i>zmP4H5</i>     | QT-zmP4H5-1       | GGCCAGAAAGCGACCCGACC  |
|                   | QT-zmP4H5-2       | GCGCGGGAGATCACAGGTGG  |
| <i>actin</i>      | Actin1-Q-1        | TTCTACGGGCGGTGCAGTGGA |
|                   | Actin1-Q-2        | TACCACACGCCGCCGCATTTT |
| <i>Adh</i>        | mzADH-Q-1         | AGGTGGAGGTAGCGCCTCCG  |
|                   | mzADH-Q-2         | CGGTGTGGCAGAGCGAGGTG  |

<sup>a</sup> The names of *zmP4H* genes.

<sup>b</sup> The names of the primers.

<sup>c</sup> The sequence of the primers.

TABLE S4. General information for *zmP4H* genes

| Gene            | Gene Accession | Gene Length | ORF location | Deduced protein length |
|-----------------|----------------|-------------|--------------|------------------------|
| <i>zmP4H1</i>   | JF901712       | 1278        | 111-1034     | 308                    |
| <i>zmP4H2</i>   | JF901713       | 1182        | 113-1012     | 300                    |
| <i>zmP4H2-1</i> | JF901714       | 1196        | 113-727      | 205                    |
| <i>zmP4H3</i>   | JF901715       | 1284        | 211-1095     | 295                    |
| <i>zmP4H4</i>   | JF901716       | 1373        | 282-1106     | 275                    |
| <i>zmP4H4-1</i> | JF901717       | 1804        | 282-467      | 62                     |
| <i>zmP4H4-2</i> | JF901718       | 1518        | 282-905      | 208                    |
| <i>zmP4H5</i>   | JF901719       | 1517        | 118-1114     | 309                    |
| <i>zmP4H5-1</i> | JF901720       | 1240        | 294-836      | 181                    |
| <i>zmP4H5-2</i> | JF901721       | 1043        | 256-375      | 40                     |
| <i>zmP4H6</i>   | JF901722       | 1111        | 69-962       | 298                    |
| <i>zmP4H6-1</i> | JF901723       | 1350        | 63-431       | 123                    |
| <i>zmP4H6-2</i> | JF901724       | 1007        | 69-557       | 163                    |
| <i>zmP4H6-3</i> | JF901725       | 1174        | 63-689       | 209                    |
| <i>zmP4H6-4</i> | JF901726       | 953         | 69-506       | 146                    |
| <i>zmP4H7</i>   | JF901727       | 1195        | 92-988       | 299                    |
| <i>zmP4H8</i>   | JF901728       | 1359        | 106-1029     | 308                    |
| <i>zmP4H8-1</i> | JF901729       | 1449        | 106-1029     | 308                    |
| <i>zmP4H8-2</i> | JF901730       | 998         | 106-660      | 185                    |
| <i>zmP4H8-3</i> | JF901731       | 1146        | 106-672      | 189                    |
| <i>zmP4H8-4</i> | JF901732       | 1503        | 106-1029     | 308                    |
| <i>zmP4H8-5</i> | JF901733       | 1618        | 106-1029     | 308                    |
| <i>zmP4H9</i>   | JF901734       | 1437        | 222-1148     | 309                    |
